# Supplementary material for: Detection of Micrometer-Sized Virus Aerosols by Using a Real-Time Bioaerosol Monitoring System
Source: MDPI journal article supplement (doi:10.3390/bios14010027), 2024-01-02
Supplement: s1 [file s1]

# Detection of micrometer-sized virus aerosols by using a real-time bioaerosol monitoring system

Hyunsoo Seo<sup>1</sup>, Young-Su Jeong<sup>1,\*</sup>, Jackyung Bae<sup>1</sup>, Kibong Choi<sup>1</sup>, Moon-Hyeong Seo<sup>2</sup>

[\*] Corresponding Author Dr. Young-Su Jeong

E-mail: yiyap@add.re.kr

## **Supporting Information**

| Particle diameter (μm) | Ratio of fluorescence (-) |        |       |
|------------------------|---------------------------|--------|-------|
|                        | Small                     | Middle | Large |
| 1                      | 0.78                      | 0.51   | 0.00  |
| 3                      | 0.76                      | 0.95   | 0.93  |
| 4                      | 0.78                      | 0.94   | 0.91  |
| 5                      | 0.17                      | 0.46   | 0.90  |
| 7                      | 0.07                      | 0.31   | 0.91  |

**Table S1.** Table for the measured fluorescence intensity units (FIU)
